# Supplementary material
Source: publisher figshare collection journal article supplement (https://acs.figshare.com/ndownloader/files/4687306)

**Schematic diagram depicting the protocol to prepare carbon nanotube patterns on**

***non-polar* surfaces:**

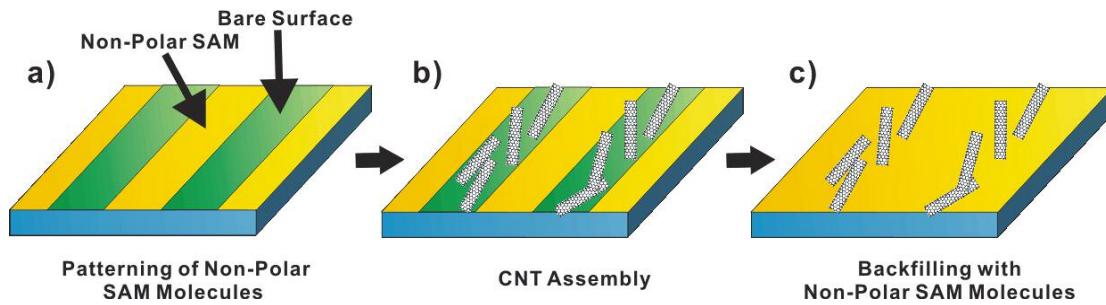

- a) Patterning non-polar SAM while leaving some bare surface regions.
- b) Assembly of carbon nanotubes directly onto bare surface regions.
- c) Backfilling the bare surface area with non-polar SAM molecules.

## Immunofluorescence Assay for HMM Adhesion

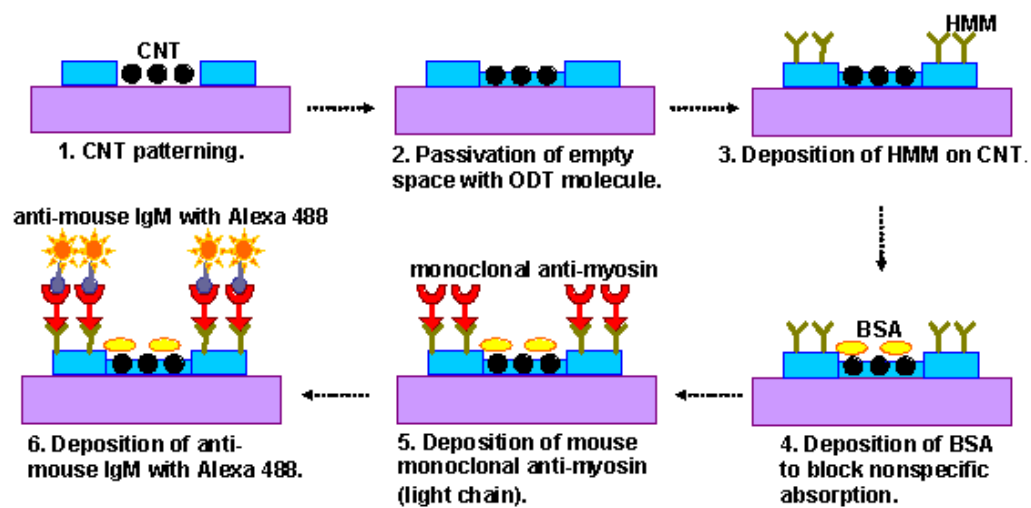

1. Deposition of HMM for 1 min on the CNT patterned substrate. (CNT 10 $\mu$ m, ODT 20 $\mu$ m)
2. Deposition of BSA to block nonspecific absorption for 1 min.
3. Deposition of mouse monoclonal anti-myosin (light chain) for 30 min.
4. Deposition of anti-mouse IgM with Alexa 488 for 30 min.

**Immunofluorescence image of HMM on the CNT patterned substrate.**

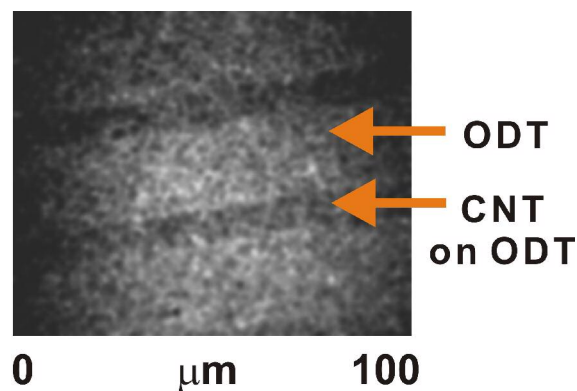

**Fluorescence image showing the blocking effect of actin adsorption by BSA.** The horizontal size of the image is 140 $\mu$ m. In this experiment, the MHA SAM was incubated in BSA solution (1mg/ml in buffer solution) for ten minutes, and then it was kept in actin solution (0.033mg/ml in buffer solution) for thirty minutes. Since BSA works as a good blocking reagent, only very few actin filaments (small bright spots) could be observed.

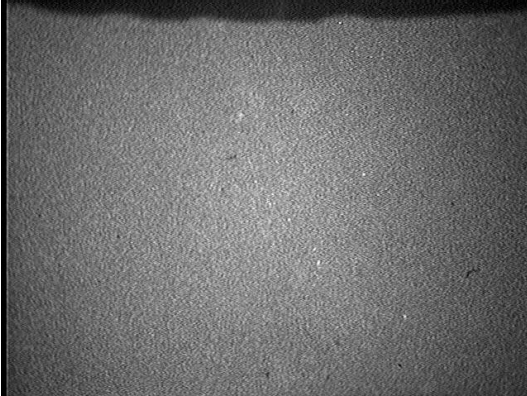

Supplement: Supplementary file 1 [file 4687306]
